# Supplementary material for: Self-assembly of a superparamagnetic raspberry-like silica/iron oxide nanocomposite using epoxy–amine coupling chemistry
Source: Royal Society of Chemistry journal article supplement (doi:10.1039/c4cc09311a), 2015-01-01
Supplement: c4cc09311a1.pdf [file c4cc09311a1.pdf]

## Electronic Supporting information

### **Self-assembly of a superparamagnetic raspberry-like silica/iron oxide nanocomposite using epoxy-amine coupling chemistry**

Manuel Cano and Guillermo de la Cueva-Méndez\*

*Synthetic Biology and Smart Therapeutic Systems Laboratory, Andalusian Centre for Nanomedicine and Biotechnology, BIONAND, Severo Ochoa 35, 29590 Campanillas, Málaga, Spain.*

#### **1. Reagents and instrumentation**

##### **1.1. Reagents**

With the exception of oleic acid (>90%) and N,N-dimethylformamide (DMF), which were obtained from Alfa-Aesar, all reagents were purchased from Sigma-Aldrich. All chemicals were used as received without any further purification. All aqueous solutions were prepared using ultrapure water from a Milli-Q system (Millipore, resistivity 18.2 MΩm at 25°C).

##### **1.2. Instrumentation**

**Fourier-transform infrared (FT-IR)** spectroscopy was carried out in a JASCO FT/IR-4100 spectrometer. **Zeta-potential** was measured using a Malvern Zetasizer Nano-ZS90. **Scanning electron microscopy (SEM)** was performed using a FEI Quanta 250 FEG microscope. **Transmission electron microscopy (TEM)** was carried out using a FEI Tecnai G2 20 TWIN TEM microscope, operated at an accelerating voltage of 100 kV. Samples were prepared on 200 mesh copper grids with a carbon sputter coated Formvar substrate. **X-ray energy dispersion (EDX)** spectroscopy was conducted with an EDAX DPP-II analyzer installed on TEM. **Thermogravimetric analysis (TGA)** was carried out using a TA Instruments METTLER TOLEDO (TGA/DSC1 model). All samples were conditioned using a N<sub>2</sub> flow of 50 ml/min at 30 °C for 15 min before measurement, and then heated from 30 to 1000 °C at 10°C/min under an air atmosphere of 50 mL/min. **X-Ray Diffraction (XRD)** was performed using a PANalytical X'Pert PRO MPD diffractometer with Cu  $\kappa_1$  radiation ( $\lambda = 1.540598 \text{ \AA}$ ). XRD patterns were assigned using the JCPDS database. **Magnetization measurements** were obtained in an EV9 Vibrating Sample Magnetometer (MicroSense). Samples were measured at 2 T under nitrogen atmosphere at both 300 K and 77 K.

#### **2. Experimental methods.**

##### **Synthesis of monodisperse SPION-OA.**

10 nm diameter monodisperse SPION-OA nanoparticles were prepared as described in Park *et al.*<sup>1</sup> The iron(III) oleate complex precursor required for this was characterized

by FT-IR, which revealed its characteristic C=O stretching peak at 1717  $\text{cm}^{-1}$  (Fig. S1a), and also by TGA (Fig. S1b).

To produce SPION-OA the iron(III)-oleate precursor was decomposed at high temperature in octadecene.<sup>1</sup> SPION-OA displayed characteristic FT-IR spectra (Fig. S2a) and X-ray diffraction (XRD) pattern (Fig. S2b). The reflection  $2\theta$  peaks obtained by XRD coincided with the JCPDS database for inverse spinel magnetite (JCPDS file 19629; Joint Committee on Powder Diffraction: Swarthmore, PA), and also indicated that our material was crystalline. Confirming the latter, we verified the superparamagnetic character of these particles (Fig. S3a). We also carried out TGA analyses of our SPION-OA preparations (Fig. S3b), which showed a total weight loss of 83.4 % and provided an explanation for the apparently low saturation magnetization values observed in Fig. S3a.

### **Synthesis of SPION-APTES.**

SPION-APTES were prepared following the silane ligand exchange method described by De Palma et al.<sup>2</sup> These particles were analyzed by FT-IR, which revealed the characteristic bands for the Si-O-Si vibrations in the silane layer (1000-1150  $\text{cm}^{-1}$ ) and the two N-H bendings at 1631 and 1550  $\text{cm}^{-1}$ , typical of amine groups (Fig. S4, black line).

### **Synthesis of SPION-APTES/SA.**

The SPION-APTES/SA nanoparticles were prepared according to the procedure described in *An et al.*<sup>3</sup>, with modifications. Briefly, 40 mg of SPION-APTES were dissolved in 20 mL DMF, and mixed with 20 mL of 0.2 M succinic anhydride, also in DMF. This mixture was stirred for 2h at room temperature to produce SPION-APTES/SA particles, which were subsequently purified by centrifugation and resuspension in DMF. The FT-IR spectrum of these particles displayed two vibrations at 1555 and 1410  $\text{cm}^{-1}$ , assigned to the asymmetric and symmetric COO<sup>-</sup> stretchings, respectively, which were not observed in their SPION-APTES precursor (Fig. S4, red line).

### **Ninhydrin method.**

The reduction (yet availability) of amine groups on the surface of SPION-APTES produced as described above was confirmed by a colorimetric reaction using ninhydrin.<sup>4</sup> Briefly, 1 mL of SPION-APTES or SPION-APTES/SA in water (at a concentration of 2.5  $\mu\text{g}/\text{mL}$ ) were mixed with 1 mL of ninhydrin solution<sup>4</sup> in glass tubes, heated until boiling, and then chilled on ice. 5 mL of 50% ethanol were added to each tube and mixed thoroughly, and the absorbance of the resulting mixture at 570 nm was determined using a spectrophotometer.

### **Synthesis of silica NPs.**

Silica NPs were produced using a modified Stöber method described in *English et al.*<sup>5</sup> The resulting particles were analysed by XRD, which revealed the characteristic  $2\theta$

reflection peak of amorphous silica (Figure S5a). Further analysis of these particles by FT-IR revealed the absorption peak at  $1064\text{ cm}^{-1}$ , corresponding to the Si-O-Si asymmetric stretching vibration, and the peaks ( $950\text{ cm}^{-1}$  and  $800\text{ cm}^{-1}$ ) ascribed to the asymmetric bending and stretching vibration of Si-OH (Figure S5b).

### Synthesis of epoxy-silane modified silica NPs.

Silica NPs (0.5 g) were suspended in toluene (100 mL) by sonication for 15 min. 5 mL of 3-(3-Glycidyloxypropyl)trimethoxysilane (GPES) were slowly added to the suspension of NPs and the mixture was heated to  $90\text{ }^{\circ}\text{C}$  for 48 h under an inert gas saturated atmosphere, and then cooled down to room temperature. The resulting epoxy-silane coated silica NPs were collected by centrifugation ( $9780\text{ xg}$ ; 10 min at  $4\text{ }^{\circ}\text{C}$ ) and resuspended in toluene, and subsequently purified through several cycles of centrifugation and re-dispersion in absolute ethanol.

### Further characterization of raspberry-like nanocomposites.

Additional TEM images of the superparamagnetic nanocomposites are showed in Figure S6. The zeta-potential analysis reveals a surface charge change from  $+41\text{ mV}$  of epoxytated silica NPs to  $-32\text{ mV}$  of the nanocomposites (Fig. S7a). The FT-IR shows that after the SPION coating new bands appeared in low frequency region ( $\sim 600\text{ cm}^{-1}$ ) characteristic of the Fe-O skeleton, the N-H bendings ( $\sim 1600\text{ cm}^{-1}$ ) of amine and the  $\text{COO}^-$  stretchings ( $1400\text{-}1500\text{ cm}^{-1}$ ) of carboxylic acid groups (Fig. S7b). Fig. S8 shows an energy dispersion X-ray analysis (EDX) performed in situ during TEM image capture of empty copper grids (blank control), a SPION-APTES/SA, an epoxytated silica particles and a raspberry-like nanocomposite. The appearance of the chemical signal of Fe in the EDX spectra for the hybrid material confirms the presence of SPION shell.

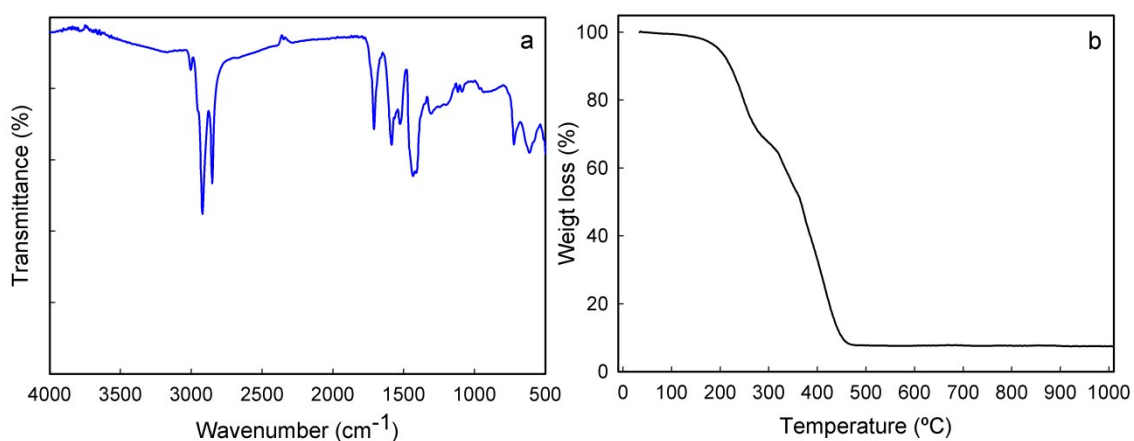

**Fig. S1:** FT-IR spectrum (a) and TGA curve (b) of iron (III) oleate complex.

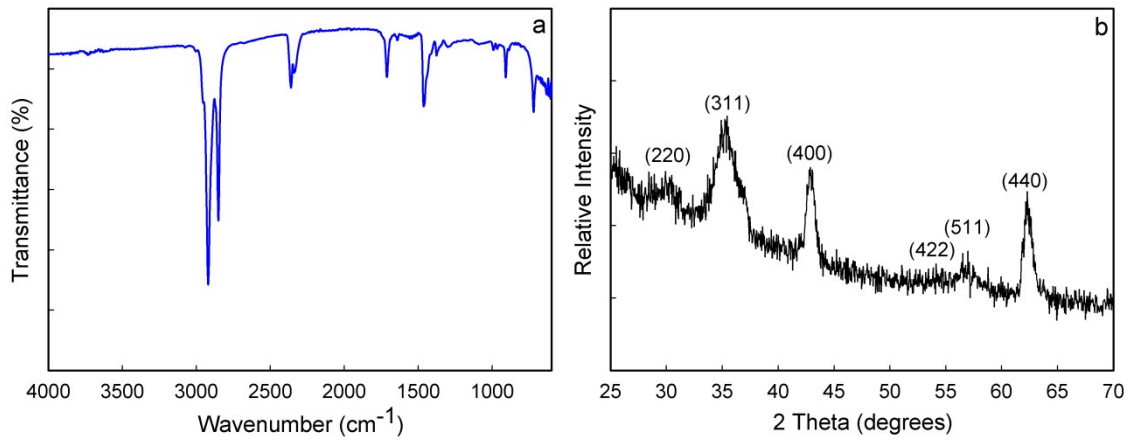

**Fig. S2:** FT-IR spectrum (a) and XRD plot (b) of SPION-OA.

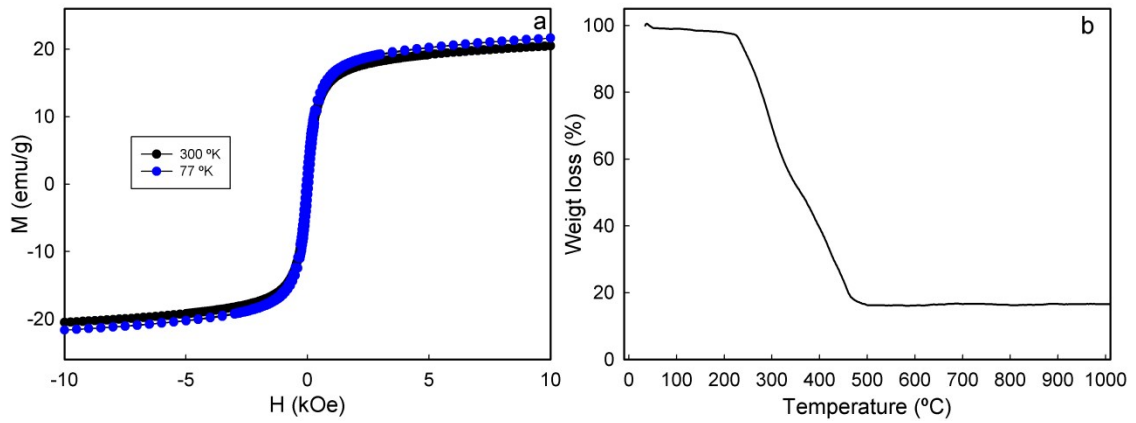

**Fig. S3:** Magnetization (a) and TGA (b) plots of SPION-OA.

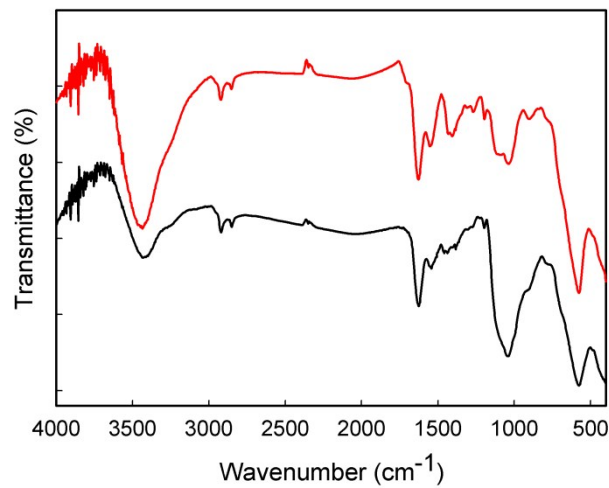

**Fig. S4:** FT-IR spectrum of SPION-APTES (black line) and SPION-APTES/SA (red line).

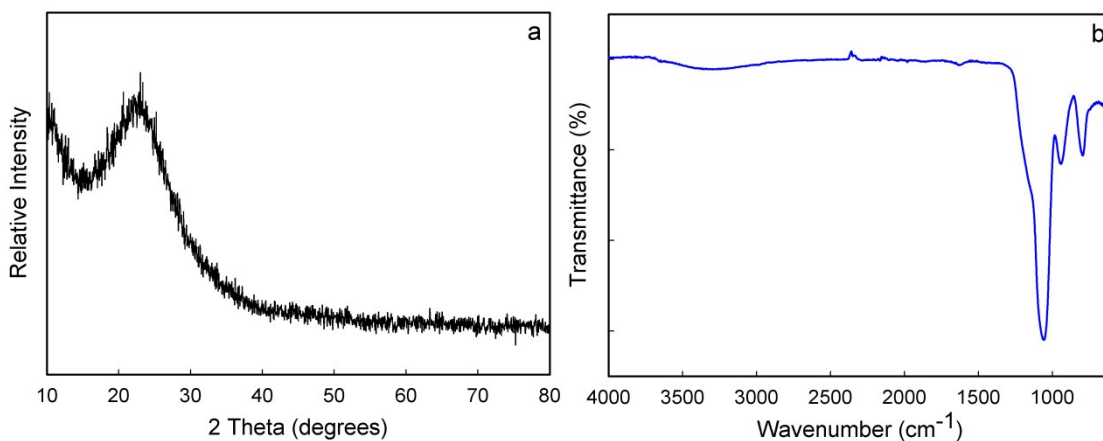

**Fig. S5:** DRX plot (a) and FT-IR spectrum (b) of bare silica NPs.

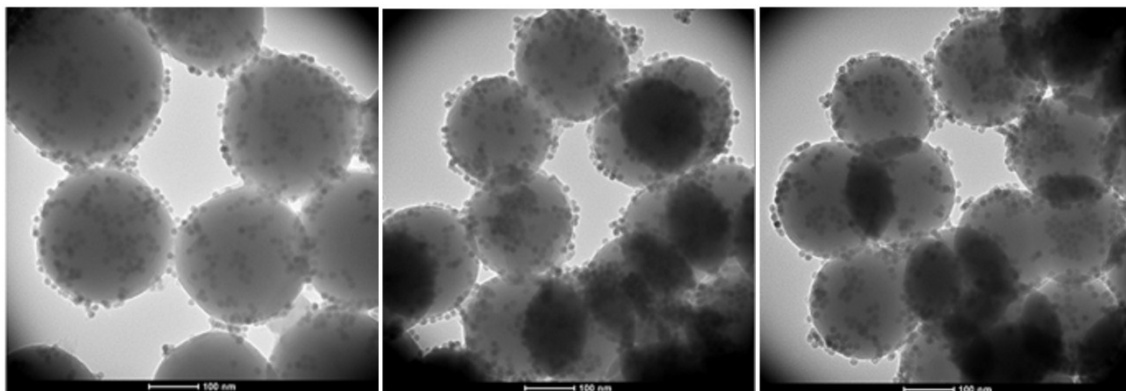

**Fig. S6:** Additional TEM images of the superparamagnetic nanocomposites.

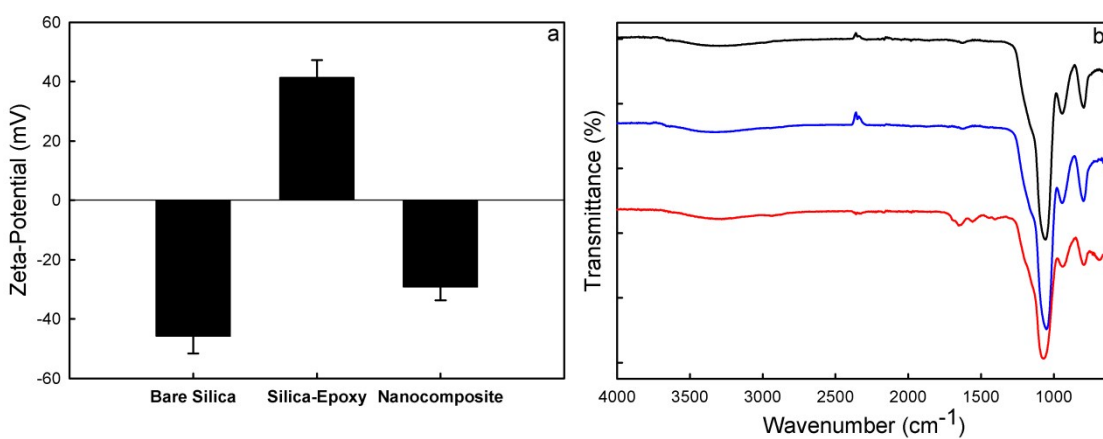

**Fig. S7:** Zeta-potential values (a) and FT-IR spectrum (b) of bare silica (black line), epoxy-modified silica (blue line) and superparamagnetic composite (red line) particles.

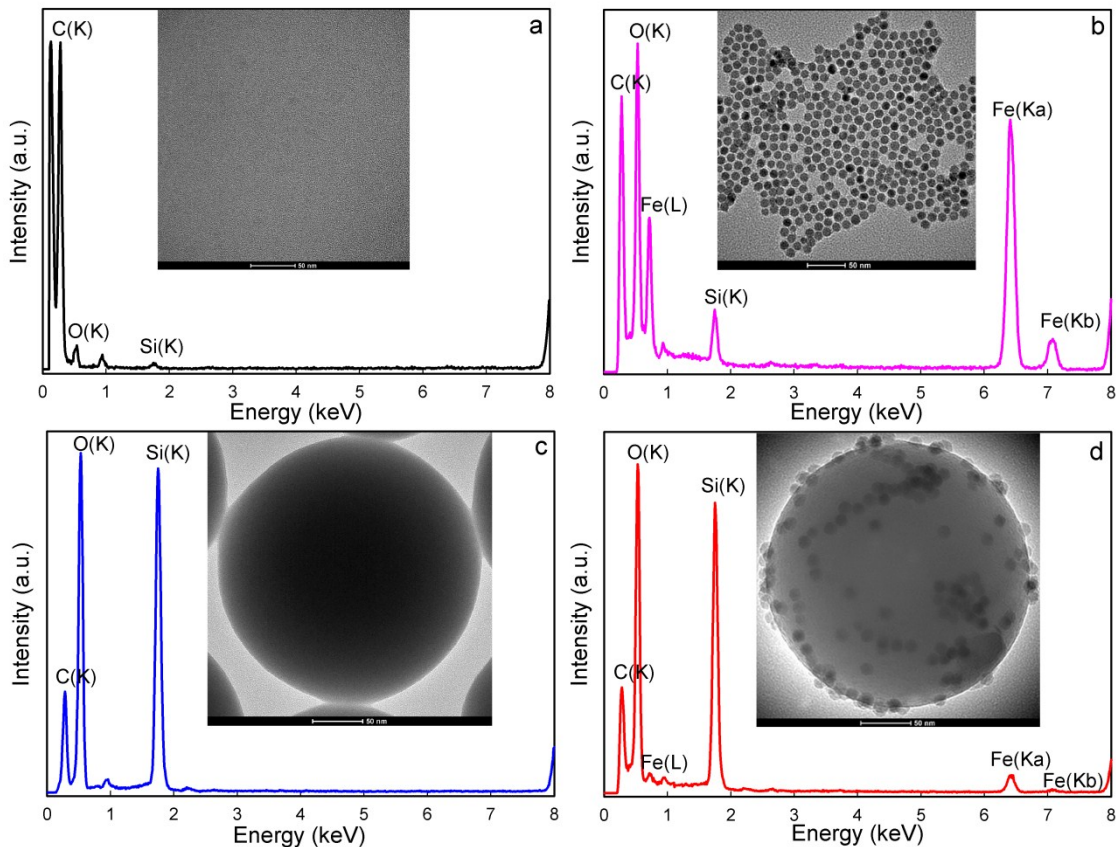

**Fig. S8:** EDX spectra with inset TEM image of an empty copper grid (a), a SPION-APTES/SA (b), an epoxy-modified silica (c) and a superparamagnetic nanocomposite (d).

## References

- 1- J. Park, K. An, Y. Hwang, J.-G. Park, H.-J. Noh, J.-Y. Kim, J.-H. Park, N.-M. Hwang and T. Hyeon, *Nat. Mater.* 2004, **3**, 891-895.
- 2- R. De Palma, S. Peeters, M.J. Van Bael, H. Van den Rul, K. Bonroy, W. Laureyn, J. Mullens, G. Borghs, G. Maes, *Chem. Mater.* 2007, **19**, 1821-1831.
- 3- Y. An, M. Chen, Q. Xue, W. Liu, *Journal of Colloid and Interface Science* 2007, **311**, 507-513.
- 4- S.-W. Sun, Y.-C. Lin, Y.-M. Weng, and M.-J. Chen, *Journal of Food Composition and Analysis* 2006, **19**, 112-117.
- 5- M.D. English, E.R. Waclawik, *J. Nanopart. Res.* 2012, **14**, 650.
